# Supplementary material
Source: Springer Nature journal article supplement (https://www.springermedizin.de/resource/supplementary/12885_2013_4578_MOESM5_ESM.pdf/9466780)

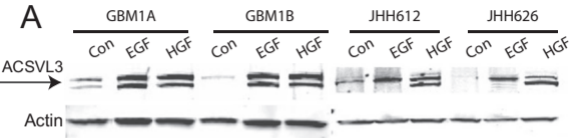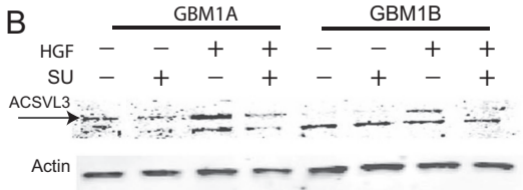

Supplement: MOESM5 [file 9466780]
